# Supplementary material for: Remote, fast actuation of programmable multiple shape memory composites by magnetic fields
Source: Royal Society of Chemistry journal article supplement (doi:10.1039/c5tc02464a), 2015-01-01
Supplement: c5tc02464a1.pdf [file c5tc02464a1.pdf]

## Supplementary information

### Remote, fast actuation of programmable multiple shape memory composites by magnetic fields

F.H. Zhang<sup>a,b</sup>, Z. C. Zhang<sup>a</sup>, C. J. Luo<sup>b</sup>, I-Ting Lin<sup>b</sup>, Yanju Liu<sup>c</sup>, Jinsong Leng<sup>a,\*</sup>, and Stoyan K. Smoukov<sup>b,\*</sup>

#### Experimental

##### Materials

Nafion<sup>®</sup> solution with polymer content 5.0 wt% was purchased from DuPont (Wilmington, USA). Fe<sub>3</sub>O<sub>4</sub> nanopowder was purchased from Aladdin Chemistry Co.,Ltd. (Shanghai, China). Poly(ethyleneoxide) (PEO) (Mn=900 000) was obtained from Changchun Jinghua Co., Ltd.(Changchun, China). All these chemicals were used without any further treatment.

##### Characterization

The morphology of Nafion/Fe<sub>3</sub>O<sub>4</sub> membranes was observed by FEI Nova Nano SEM FEG.

The mechanical performance was tested with a dynamic mechanical analyzer (DMA, TA) at a constant frequency of 1 Hz from 25 °C to 120 °C at heating rate of 10 °C/min.

The magnetic property measurements were carried out on a vibrating sample magnetometer (VSM).

The shape memory effect was measured by dynamic mechanical analyzer (DMA, TA) in force control model.

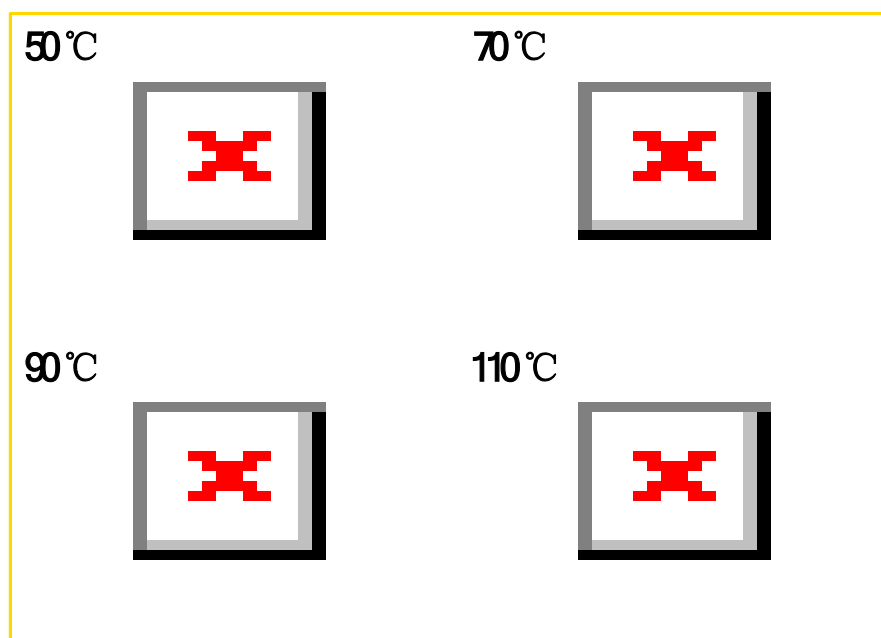

Fig. S1 SEM images of Nafion/Fe<sub>3</sub>O<sub>4</sub> composite fibers treated under different temperatures.

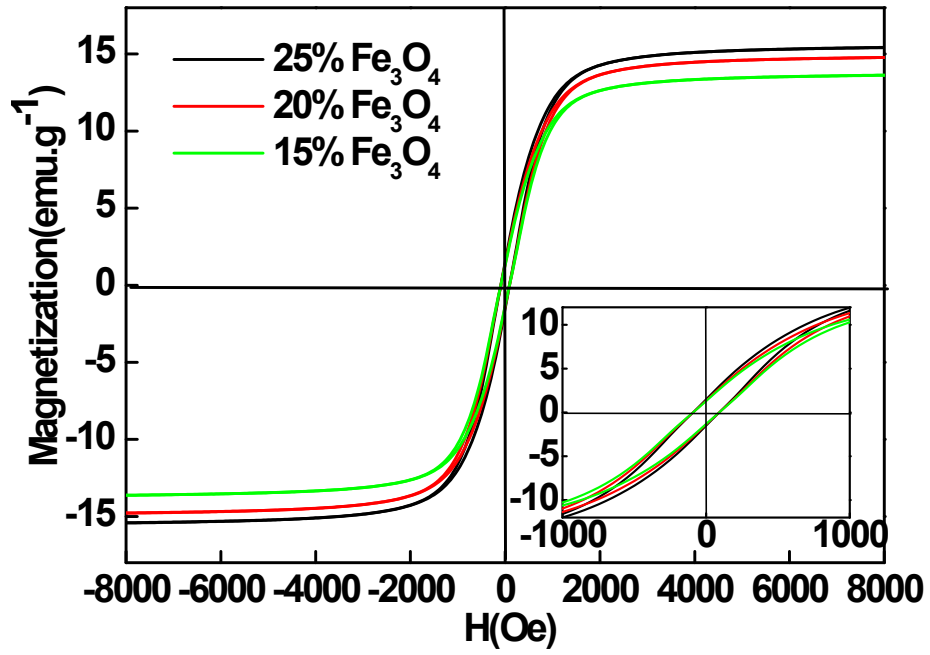

Fig.S2 VSM curves of Nafion/Fe<sub>3</sub>O<sub>4</sub> composite fibers.

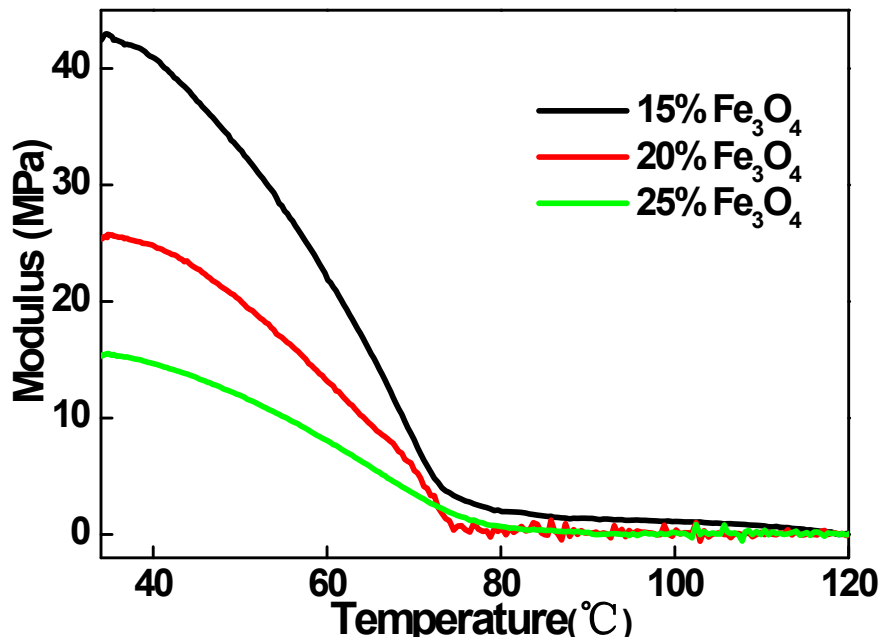

Fig. S3 DMA images of Nafion/Fe<sub>3</sub>O<sub>4</sub> composites fibers.

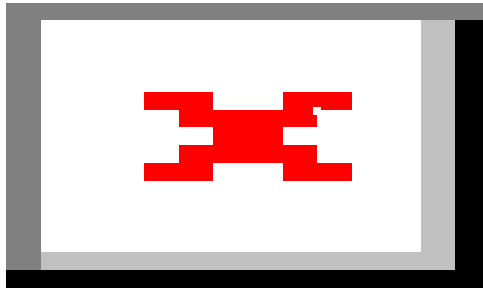

Fig. S4 Dual-shape memory effect: (a) shape recovery performance induced by magnetic field, (b) shape memory cycle, (c) three cycles.

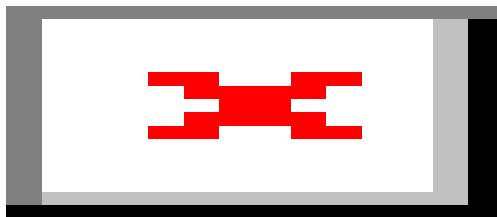

Fig. S5 Tangent delta curves ( $G''/G'$ ) vs temperature: (A) Nafion N117, (B) Nafion/ $\text{Fe}_3\text{O}_4$  composites fibers.

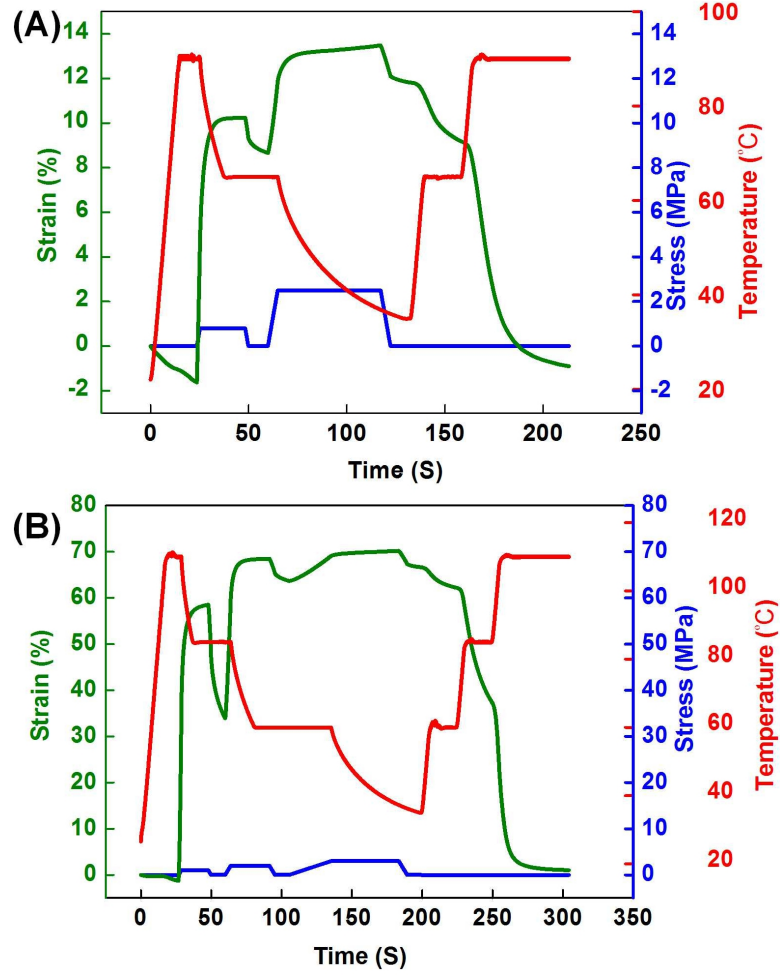

Fig. S6 (A) triple thermal mechanical cycle ( $T_{d1} = T_{r2} = 90\text{ }^{\circ}\text{C}$ ,  $T_{d2} = T_{r1} = 70\text{ }^{\circ}\text{C}$ ), (B) quadruple thermal mechanical cycle ( $T_{d1} = T_{r3} = 110\text{ }^{\circ}\text{C}$ ,  $T_{d2} = T_{r2} = 85\text{ }^{\circ}\text{C}$ ,  $T_{d3} = T_{r1} = 60\text{ }^{\circ}\text{C}$ ).

Equations (1) and (2) were used to calculate  $R_f$  and  $R_r$  for the multi-shape memory effect [5].

$$R_f(X \rightarrow Y) = \frac{\varepsilon_y - \varepsilon_x}{\varepsilon_{y,load} - \varepsilon_x} \times 100\% \quad (1)$$

$$R_r(Y \rightarrow X) = \frac{\varepsilon_y - \varepsilon_{x,rec}}{\varepsilon_y - \varepsilon_x} \times 100\% \quad (2)$$

where X and Y denoted different shapes,  $\varepsilon_{y,load}$  was the maximum strain under load,  $\varepsilon_y$  and  $\varepsilon_x$  were the fixed

strains after cooling and load removal, and  $\varepsilon_{x,rec}$  was the strain after recovery.

Tab. S1. Shape memory properties of Nafion/Fe<sub>3</sub>O<sub>4</sub> nanofibers.

| Multi-shape memory cycle     | Shape fixity (%) | Shape recovery (%) |
|------------------------------|------------------|--------------------|
| Triple-shape memory cycle    | S0→S1=93.1       | S1→S0=94.7         |
|                              | S1→S2=71.4       | S2→S1=82.9         |
| Quadruple-shape memory cycle | S0→S1=64.3       | S1→S0=97.1         |
|                              | S1→S2=95.7       | S2→S1=96.5         |
|                              | S2→S3=66.2       | S3→S2=89.2         |

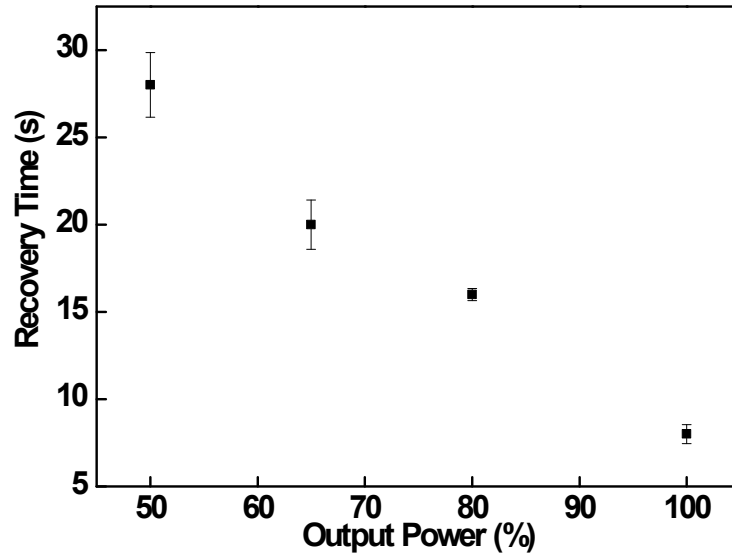

Fig. S7 Shape recovery time vs output power (Nafion composite fibers with 25% Fe<sub>3</sub>O<sub>4</sub>).
